# Supplementary material for: On the structural diversity of [K(18-crown-6)EPh3] complexes (E = C, Si, Ge, Sn, Pb): synthesis, crystal structures and NOESY NMR study
Source: Royal Society of Chemistry journal article supplement (doi:10.1039/c3dt50523e), 2013-01-01
Supplement: c3dt50523e.pdf [file c3dt50523e.pdf]

## Electronic Supplementary Information

# On the Structural Diversity of [K(18-Crown-6)EPh<sub>3</sub>] (E = C, Si, Ge, Sn, Pb) Complexes: Synthesis, Crystal Structures and NOESY NMR Study

Christian Kleeberg\*

Institut für Anorganische und Analytische Chemie,  
Technische Universität Carolo-Wilhelmina zu Braunschweig,  
Hagenring 30, 38106 Braunschweig, Germany.

\* Author E-mail Address: ch.kleeberg@tu-braunschweig.de

### Contents

|                                                                                                                                  |     |
|----------------------------------------------------------------------------------------------------------------------------------|-----|
| 1. Thermal decomposition of (( <i>i</i> PrN) <sub>2</sub> C <sub>2</sub> H <sub>4</sub> )B–PbPh <sub>3</sub> ( <b>4c</b> ) ..... | S2  |
| 2. <sup>1</sup> H- <sup>1</sup> H NOESY NMR spectra of <b>6a-d</b> .....                                                         | S3  |
| 3. Variable temperature <sup>1</sup> H NMR spectra of [K(18-C-6)CPh <sub>3</sub> ] ( <b>6a</b> ).....                            | S7  |
| 4. Reaction of <i>in situ</i> prepared <b>6a</b> , <b>6c-d</b> with BnBr to Ph <sub>3</sub> E–CH <sub>2</sub> Ph.....            | S8  |
| References.....                                                                                                                  | S10 |

## 1. Thermal decomposition of $((iPrN)_2C_2H_4)B-PbPh_3$ (**4c**)

Under an atmosphere of nitrogen a small amount of **4c** was placed in a melting point capillary and flame sealed. The capillary was heated to 114° – 115° C until formation of a black material. Some of the black material was attached to a glass rod by means of perfluoroether oil (in the presence of air) and a powder diffraction pattern was recorded using an Oxford Diffraction Nova A instrument, using mirror-focused  $CuK\alpha$  radiation at nominally 100 K. The data were reduced employing the CrysAlisPro software.<sup>S1</sup> A Rietveld fitting was performed using the structure of elemental lead as starting structure.<sup>S3</sup> The refined parameters were: unit cell parameters, phase scale factor, background coefficients. A polynomial background function was employed to account for the amorphous scattering of the oil and glass (Fig. S1).<sup>S2</sup> The final crystallographic and Rietveld refinement data are listed below:

|                              |   |                               |
|------------------------------|---|-------------------------------|
| Cell setting and space group | : | cubic, $Fm\bar{3}m$ (no. 225) |
| $a = b = c / \text{\AA}$     | : | 4.951(2)                      |
| $R_{wp} / R_p$               | : | 3.59% / 2.47%                 |

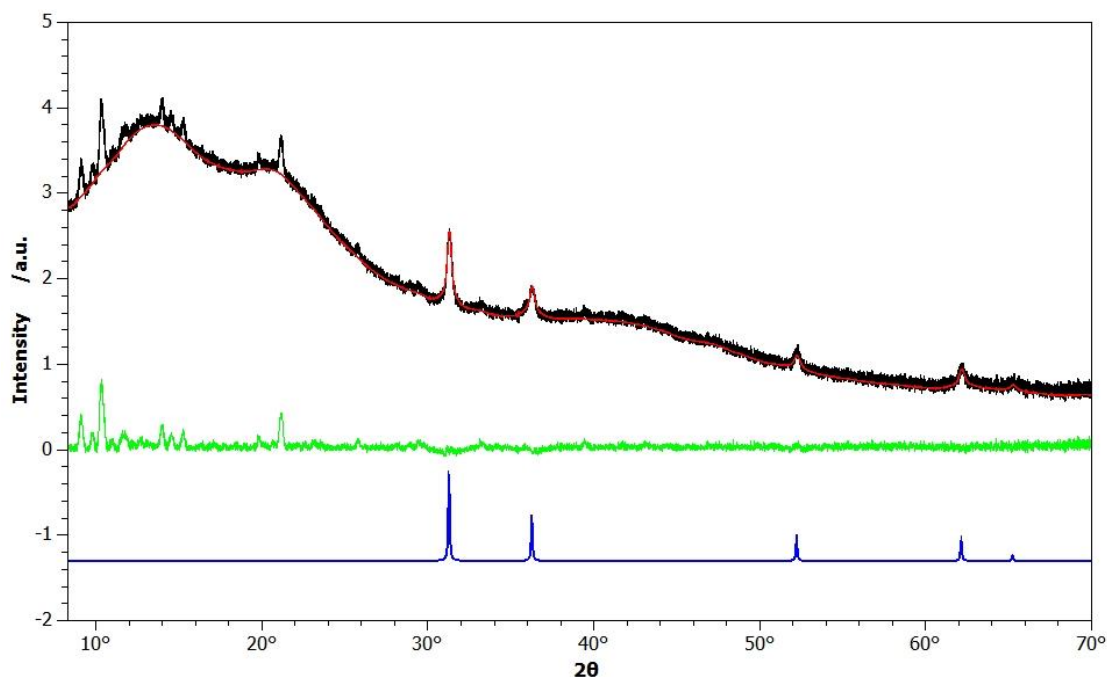

**Fig. S1:** X-ray powder diffraction pattern ( $\lambda = 1.54184 \text{ \AA}$ ) of the decomposition mixture of **4c**. black: measured data, red: result of Rietveld refinement, green: difference, blue: calculated powder pattern of Pb from literature data (intensity and zero-point are arbitrary)<sup>S3</sup>.

The diffraction pattern gives evidence that one of the decomposition products of **4c** is elemental lead. However, additional reflections below  $2\theta = 30^\circ$  are observed indicating the presence of so far unidentified additional crystalline material. Note that none of the lead oxides  $PbO$ ,  $PbO_2$  and  $Pb_3O_4$  account for these reflections. ....

## 2. $^1\text{H}$ - $^1\text{H}$ NOESY NMR spectra of **6a-d**

In a nitrogen filled glovebox a sample of the respective compound was dissolved in dried and degassed THF- $d_8$  at a concentration of 40–46  $\mu\text{mol/ml}$ , the solution was filtered, filled into an NMR tube and flame sealed.

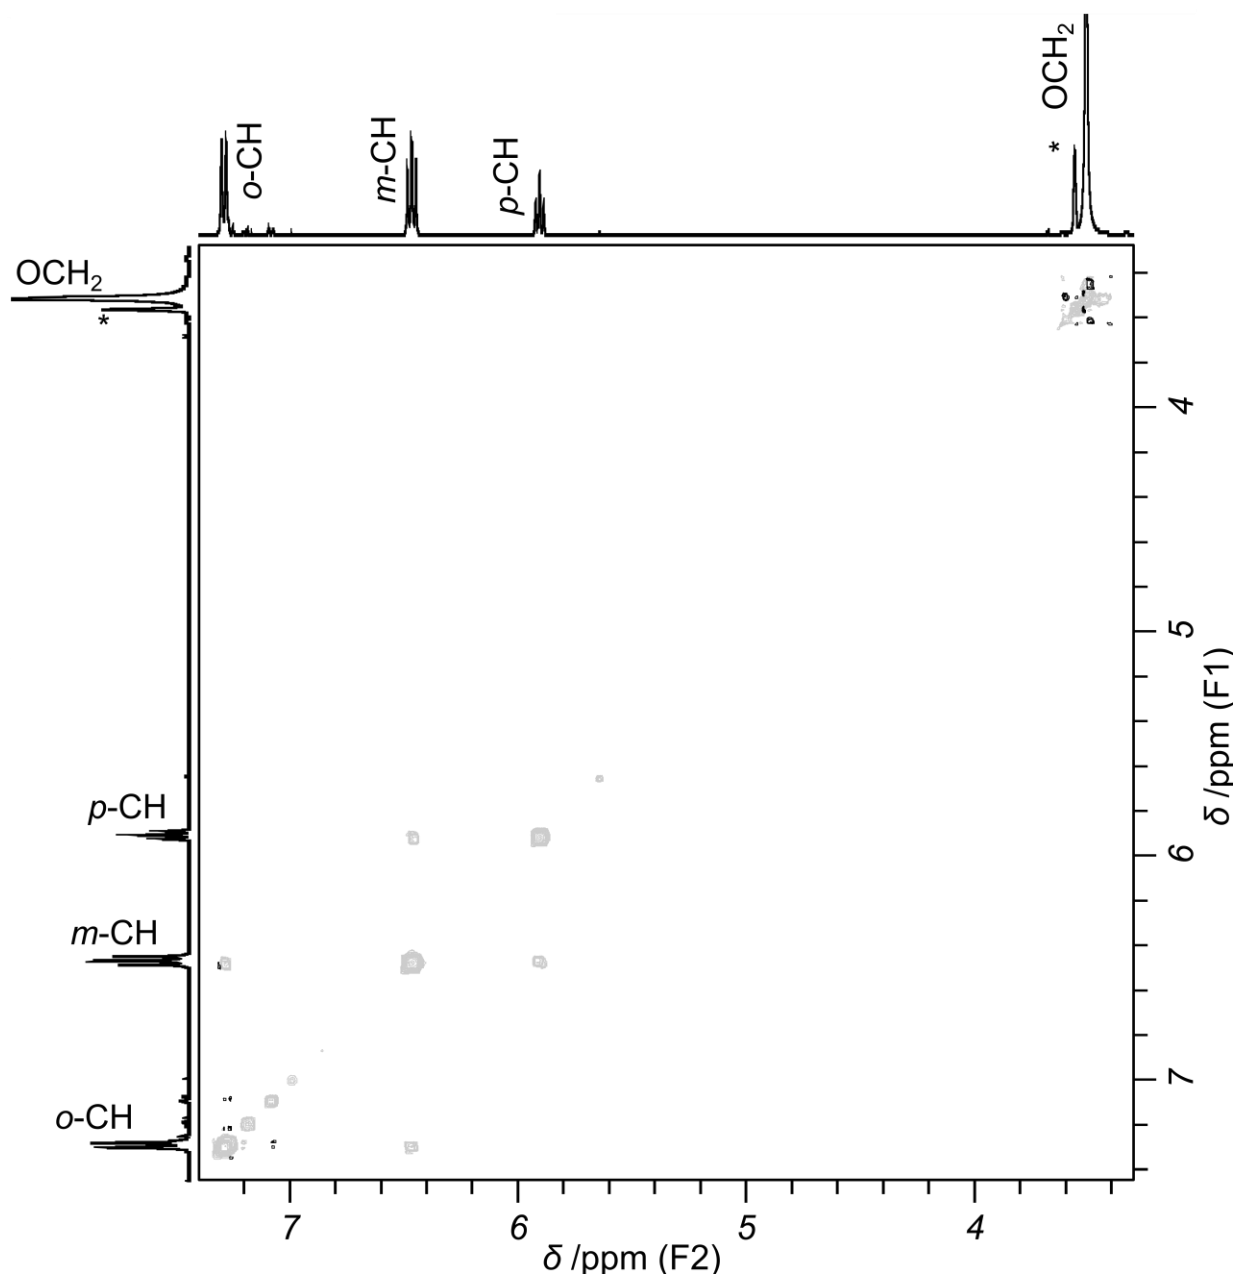

**Fig. S2:**  $^1\text{H}$ - $^1\text{H}$ -NOESY NMR spectrum of **6a** in THF- $d_8$  at  $-70\text{ }^\circ\text{C}$ . \* residual THF signal.

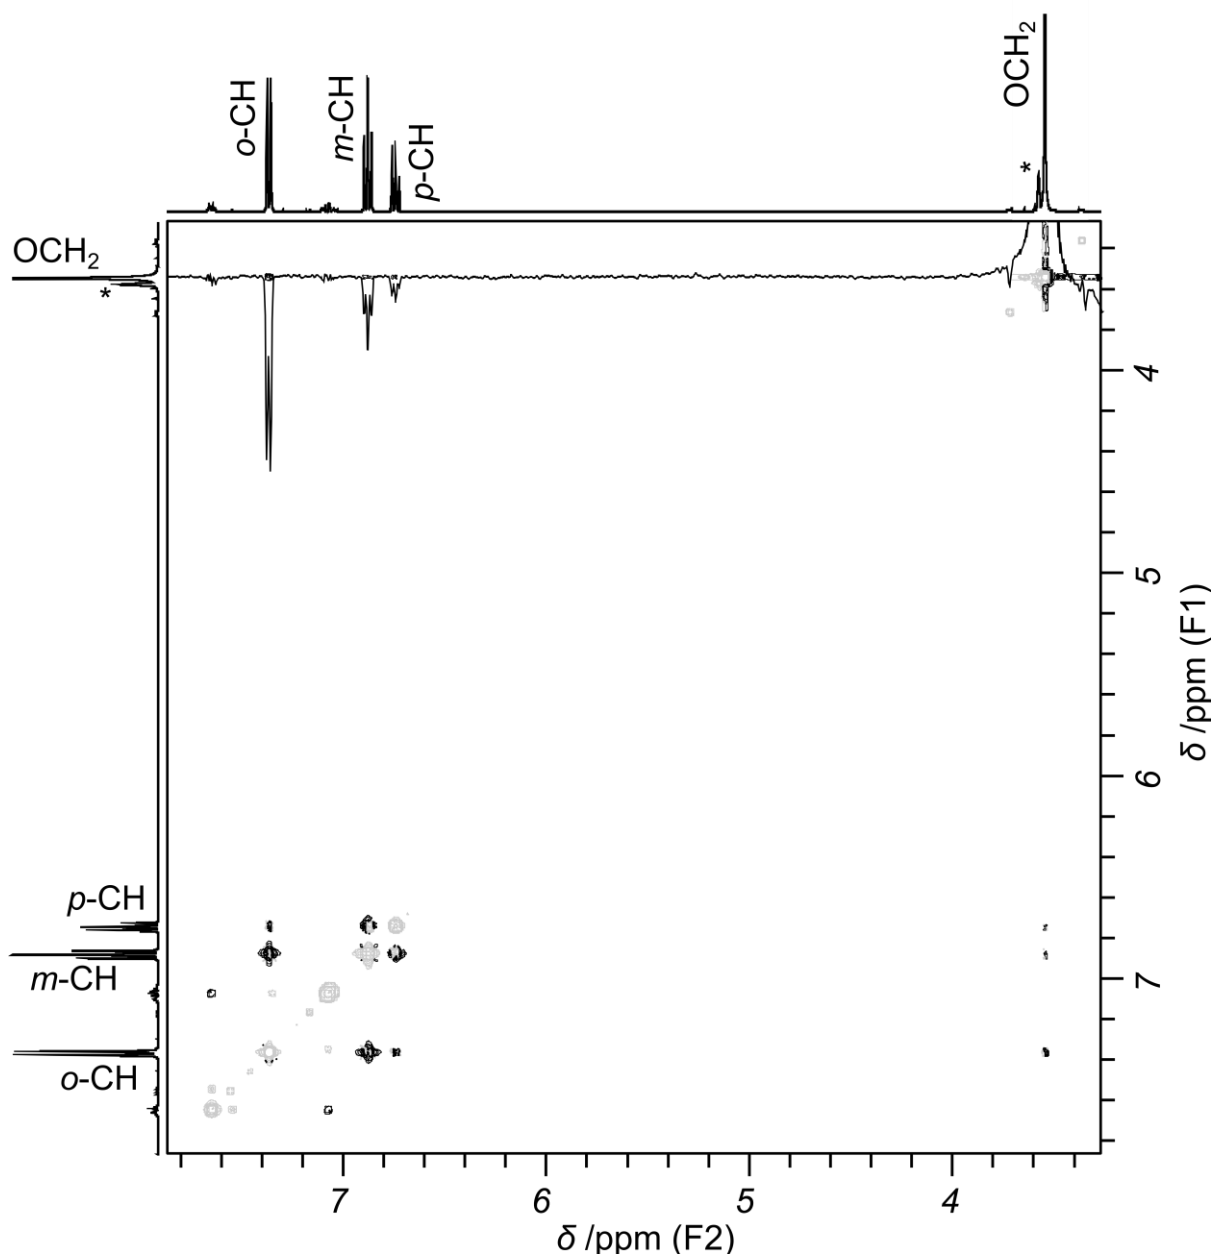

**Fig. S3:**  $^1\text{H}$ - $^1\text{H}$ -NOESY NMR spectrum of **6b** in  $\text{THF-d}_8$  at rt.  
Inset: Trace of the NOESY spectrum at the shift of the  $\text{OCH}_2$  signal. \* residual THF signal.

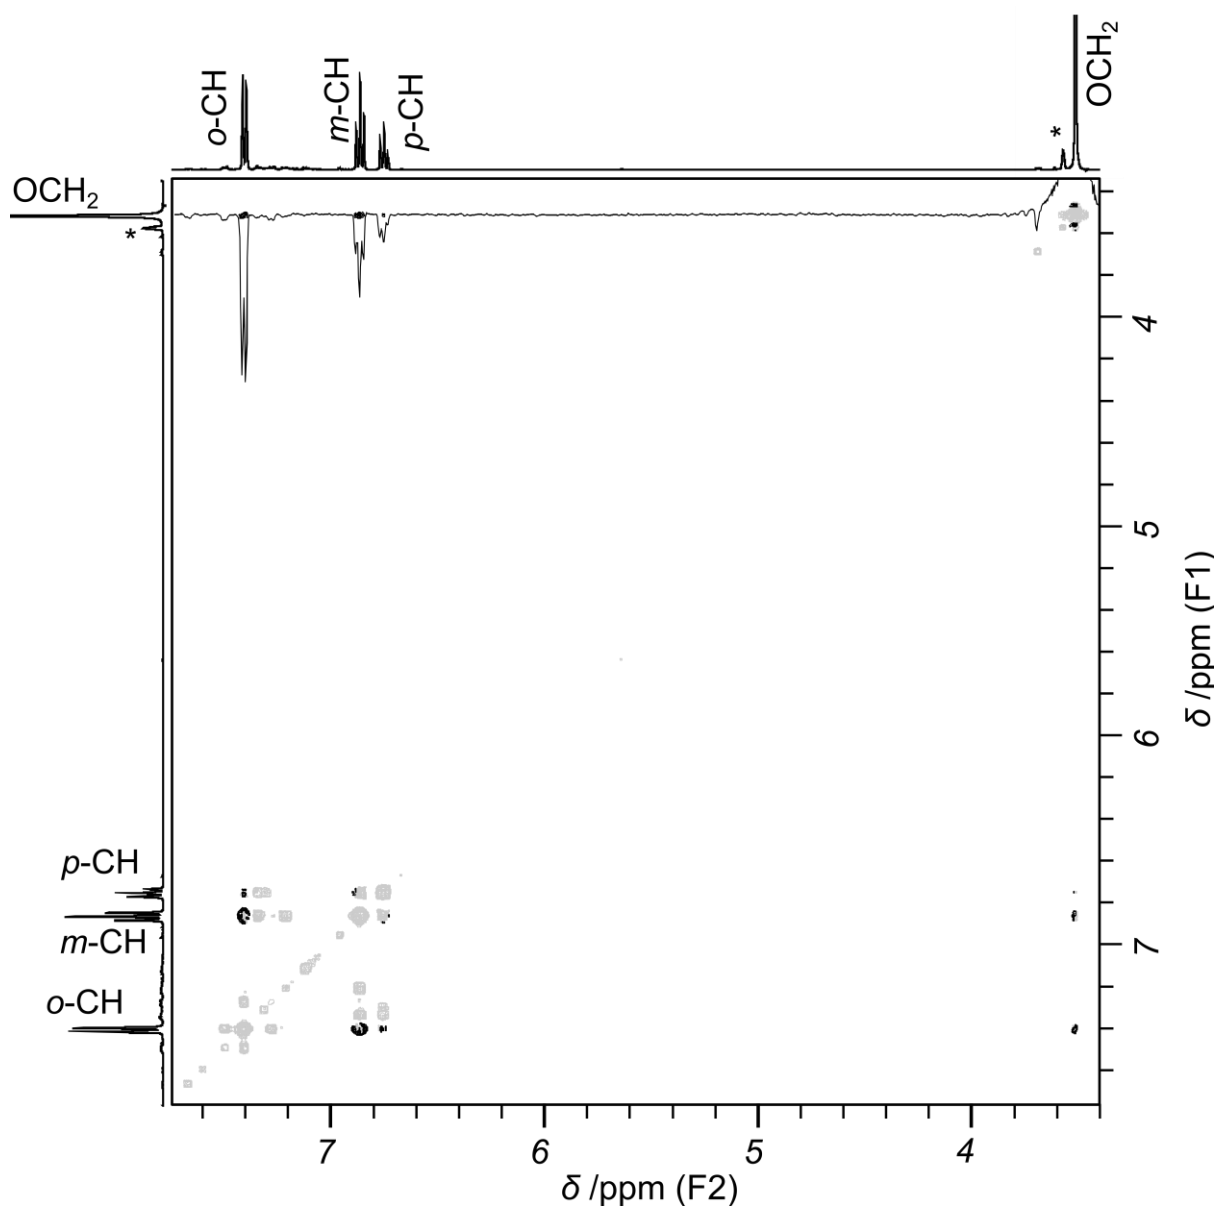

**Fig. S4:**  $^1\text{H}$ - $^1\text{H}$ -NOESY NMR spectrum of **6c** in  $\text{THF-d}_8$  at rt.  
Inset: Trace of the NOESY spectrum at the shift of the  $\text{OCH}_2$  signal. \* residual THF signal.

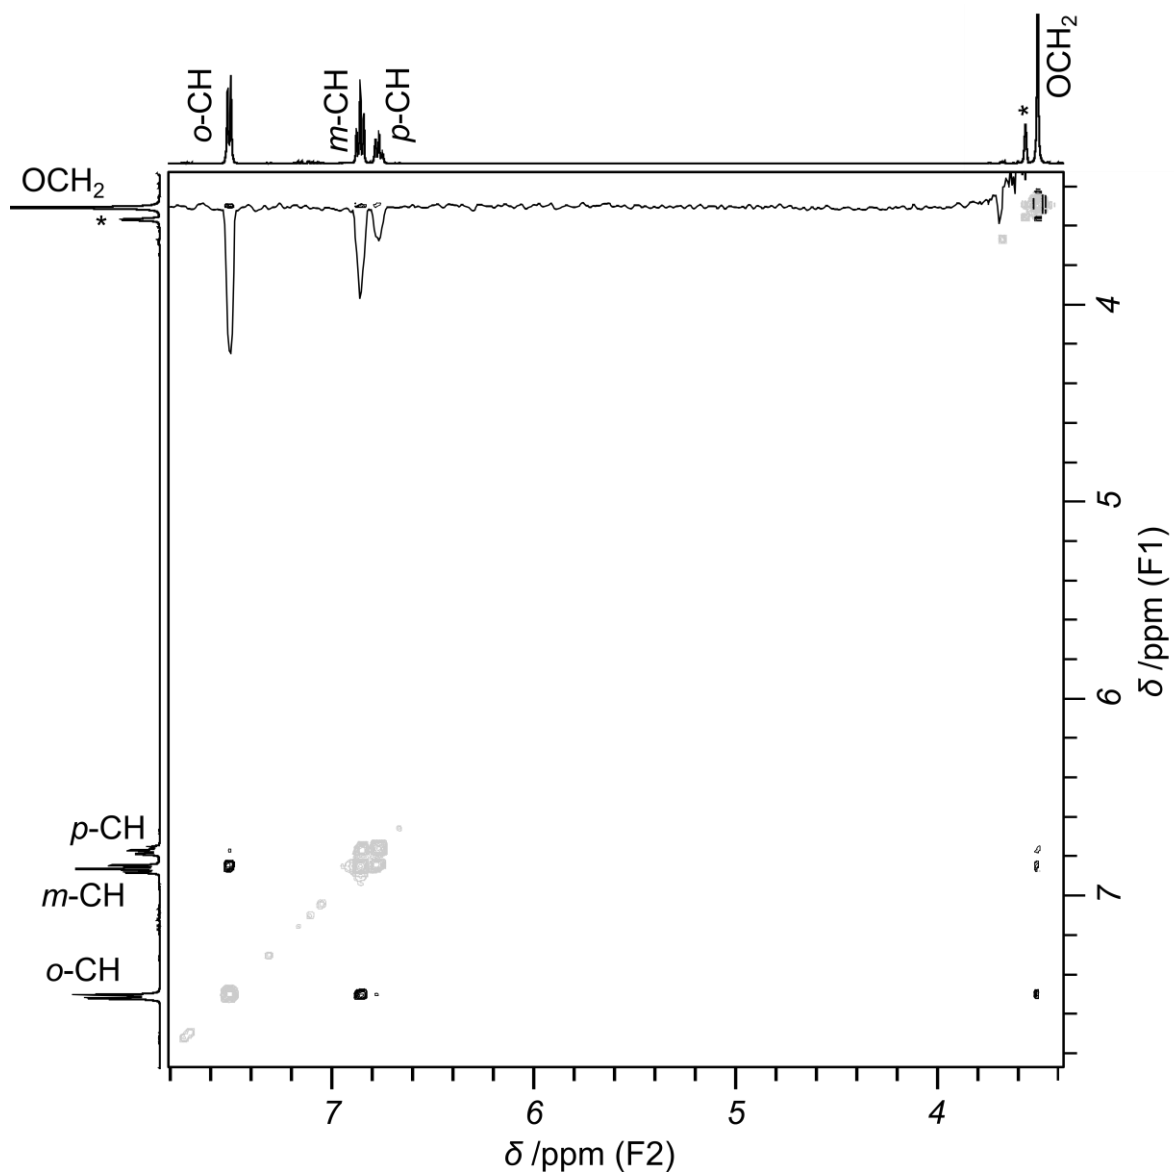

**Fig. S5:**  $^1\text{H}$ - $^1\text{H}$ -NOESY NMR spectrum of **6d** in  $\text{THF-d}_8$  at rt.  
Inset: Trace of the NOESY spectrum at the shift of the OCH<sub>2</sub> signal. \* residual THF signal.

### 3. Variable temperature $^1\text{H}$ NMR spectra of $[\text{K}(18\text{-C-6})\text{CPh}_3]$ (**6a**)

The sample was prepared as described in paragraph 2.

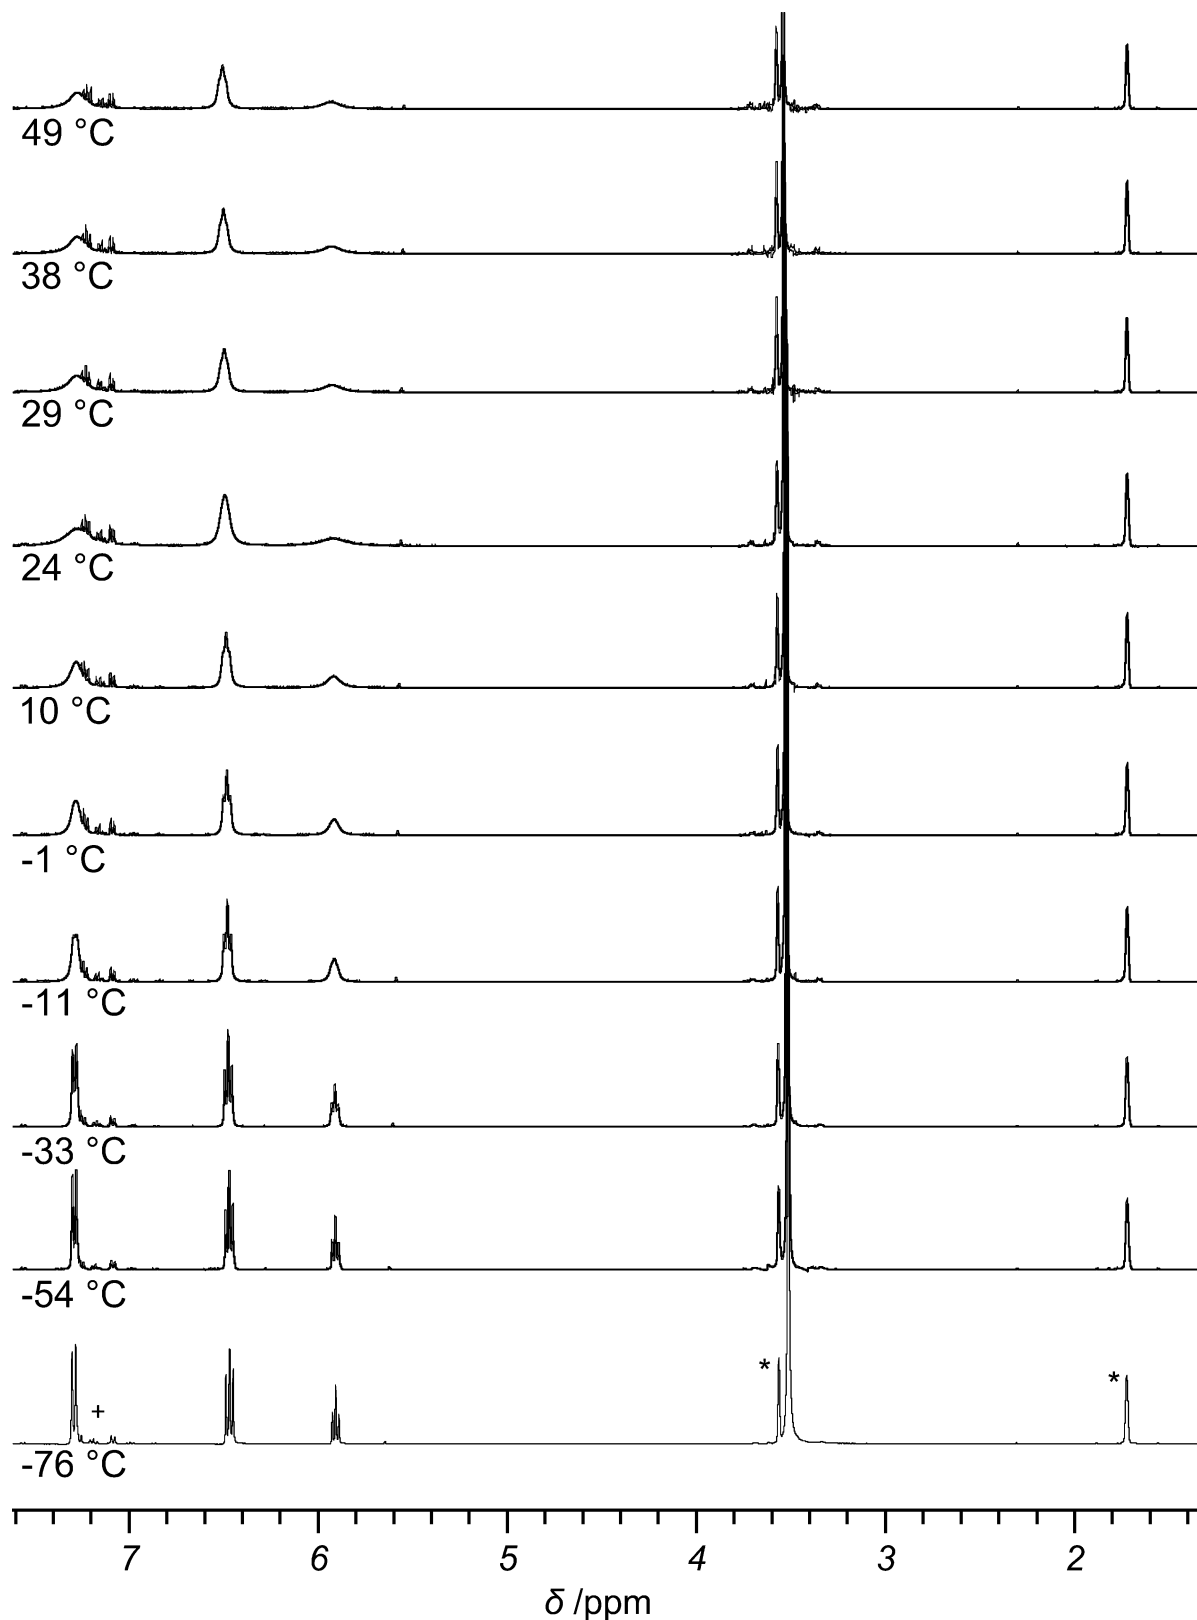

**Fig. S6:** Variable temperature  $^1\text{H}$  NMR spectra of **6a** in  $\text{THF-d}_8$ .  
+ Impurity. \* Residual THF signal.

#### 4. Reaction of *in situ* prepared **6a,c-d** with BnBr to Ph<sub>3</sub>E–CH<sub>2</sub>Ph

**Ph<sub>3</sub>C–CH<sub>2</sub>Ph:**<sup>S4a</sup> Under an atmosphere of nitrogen **5** (110 mg, 289 μmol, 1 eq) and **3a** (107 mg, 289 μmol, 1 eq) were mixed in dry THF (6 ml). After 5 min benzyl bromide (100 μl, 144 mg, 842 μmol, 2.9 eq) was added and the mixture stirred for 1 h at rt. After removal of the solvent *in vacuo* the residue was extracted with diethyl ether (10 ml) and filtered through a plug of silica gel (∅ 3 cm x 5 cm, *n*-pentane) to give the title compound as colourless crystals (81 mg, 242 μmol, 84%) after evaporation of the solvent.

**<sup>1</sup>H NMR** (300 MHz, CDCl<sub>3</sub>): δ = 7.28 – 7.07 (m, 15 H, CH<sub>Ar</sub>), 7.06 – 6.99 (m, 1 H, CH<sub>Ar</sub>), 6.97 – 6.91 (m, 2 H, CH<sub>Ar</sub>), 6.64 – 6.58 (m, 2 H, CH<sub>Ar</sub>), 3.91 (s, 2 H, CH<sub>2</sub>).

**<sup>13</sup>C NMR** (75 MHz, CDCl<sub>3</sub>): δ = 146.7 (*ipso*-C<sub>CPh<sub>3</sub></sub>), 138.6 (*ipso*-C<sub>Bn</sub>), 131.2 (*o*-CH<sub>Bn</sub>), 129.9 (*o*-CH<sub>CPh<sub>3</sub></sub>), 127.7 (*m*-CH<sub>CPh<sub>3</sub></sub>), 127.4 (*m*-CH<sub>Bn</sub>), 126.1 (*p*-CH<sub>Bn</sub>), 126.0 (*p*-CH<sub>CPh<sub>3</sub></sub>), 58.7 (CPh<sub>3</sub>), 46.4 (CH<sub>2</sub>Ph).

**Ph<sub>3</sub>GeCH<sub>2</sub>Ph:**<sup>S4b</sup> Under an atmosphere of nitrogen **5** (62 mg, 165 μmol, 1 eq) and **3b** (70 mg, 162 μmol, 1 eq) were mixed in dry THF (5 ml). After 5 min benzyl bromide (83 mg, 485 μmol, 3.0 eq) was added and the mixture stirred for 2 h at rt. After removal of the solvent *in vacuo* the residue was extracted with diethyl ether (3 ml) and filtered through a plug of silica gel (∅ 1 cm x 5 cm, *n*-pentane) to give the title compound in 90% purity (34 mg, 76 μmol, 47%).

**<sup>1</sup>H NMR** (300 MHz, CDCl<sub>3</sub>): δ = 7.48 – 6.80 (m, 20 H, CH<sub>Ar</sub>), 2.99 (s, 2 H, CH<sub>2</sub>).

**<sup>13</sup>C NMR** (75 MHz, CDCl<sub>3</sub>): δ = 139.1, 136.4, 135.3, 129.1, 128.9, 128.3, 128.2, 124.6, 23.7 (CH<sub>2</sub>).



**Ph<sub>3</sub>Sn-CH<sub>2</sub>Ph:**<sup>S4c</sup> Under an atmosphere of nitrogen **5** (60 mg, 130 μmol, 1 eq) and **4b** (50 mg, 130 μmol, 1 eq) were mixed in dry toluene (8 ml). After 5 min benzyl bromide (50 μl, 72 mg, 421 μmol, 3.2 eq) was added and the mixture stirred for 1 h at rt. After removal of the solvent *in vacuo* the residue was extracted with diethyl ether (10 ml) and purified by chromatography on silica gel (Ø 1 cm x 15 cm, *n*-pentane; *R<sub>f</sub>* = 0.1, *n*-pentane, silica gel) to give the title compound as colourless crystals (26 mg, 70 μmol, 57%) after evaporation of the solvent.

**<sup>1</sup>H NMR** (300 MHz, CDCl<sub>3</sub>): δ = 7.44 – 7.37 (m, 9 H, CH<sub>Ar</sub>), 7.36 – 7.28 (m, 6 H, CH<sub>Ar</sub>), 7.10 – 7.01 (m, 3 H, CH<sub>Ar</sub>), 6.88 – 6.82 (m, 2 H, CH<sub>Ar</sub>), 2.93 (s, 2 H, CH<sub>2</sub>).

**<sup>13</sup>C NMR** (75 MHz, CDCl<sub>3</sub>): δ = 138.2 (*ipso*-C<sub>Bn</sub>), 136.1 (*o/m*-CH<sub>Ph<sub>3</sub>Si</sub>), 134.2 (*ipso*-CH<sub>Ph<sub>3</sub>Si</sub>), 129.6 (*p*-CH<sub>Ph<sub>3</sub>Si</sub>), 129.3 (*o/m*-CH<sub>Bn</sub>), 128.1 (*o/m*-CH<sub>Bn</sub>), 127.9 (*p*-CH<sub>Ph<sub>3</sub>Si</sub>), 124.5 (*p*-CH<sub>Bn</sub>), 23.6 (CH<sub>2</sub>).

## References:

- S1 Agilent Technologies, *CrysAlisPro*, Version 1.171.35.11, 2011.
- S2 B. A. Hunter, *Rietica for Windows*, Version 1.7.7, 1997.
- S3 R. W. G. Wyckhoff, *Crystal Structures*, 1963, **1**, 7–83.
- S4 (a) M. I. Watkins and G. A. Olah, *J. Am. Chem. Soc.*, 1981, **103**, 6566-6575; (b) S. Kiyooka, T. Shibuya, F. Shiota and R. Fujiyama, *Bull. Chem. Soc. Jpn.*, 1989, **62**, 1361-1363; (c) C. Eaborn, A. R. Hancock and W. A. Stańczyk, *J. Organomet. Chem.*, 1981, **218**, 147-154.
